# Supplementary material for: Ubiquitin Proteasome pathway proteins as potential drug targets in parasite Trypanosoma cruzi
Source: PubMed Central journal article supplement (PMC5976635; doi:10.1038/s41598-018-26532-z), 2018-05-30
Supplement: 41598_2018_26532_MOESM1_ESM.pdf [file 41598_2018_26532_MOESM1_ESM.pdf]

## **Ubiquitin Proteasome pathway as potential drug target in parasite Trypanosoma cruzi**

Ishita Gupta<sup>1,2</sup>, Suruchi Aggarwal,<sup>2</sup> Kanika Singh<sup>2</sup>, Amit Yadav<sup>2</sup>, Sameena Khan\*<sup>2</sup>

Address:<sup>1</sup> Structural Immunology Group, International Centre for Genetic Engineering and Biotechnology, New Delhi 110067, India.<sup>2</sup> Drug Discovery Research Centre, Translational Health Science and Technology Institute, Faridabad 121001, India.

Email: Ishita Gupta- [ishita@icgeb.res.in](mailto:ishita@icgeb.res.in); Suruchi Aggarwal-[suruchi@thsti.res.in](mailto:suruchi@thsti.res.in); Kanika Singh-[ksingh@thsti.res.in](mailto:ksingh@thsti.res.in); Amit Kumar Yadav-[amit.yadav@thsti.res.in](mailto:amit.yadav@thsti.res.in); Sameena Khan\* - [sameena@thsti.res.in](mailto:sameena@thsti.res.in)

\*Corresponding author

Supplementary Table S1: Orthologous clusters predicted by OrthoVenn for species  
It is included as excel file.

Supplementary Table S2: Predicted Number of domains of E3s in *T. cruzi*

| E3s classification | Domain      | Uniprot IDs *                                                                                                                                                                                                                                                                                                                                                                                                                                                                                    | Predicted Functions                                                                                                                                                          |
|--------------------|-------------|--------------------------------------------------------------------------------------------------------------------------------------------------------------------------------------------------------------------------------------------------------------------------------------------------------------------------------------------------------------------------------------------------------------------------------------------------------------------------------------------------|------------------------------------------------------------------------------------------------------------------------------------------------------------------------------|
| RING               | RING        | Q4DYYQ0, Q4D110, Q4DB31, Q4D178, Q4DJF2, Q4CKL0, Q4DAL0, Q4E2K5, Q4E1T1, Q4DL73, Q4DPJ5, Q4DT67, Q4DXI0, Q4D0X0, Q4CZEE8, Q4CY74, Q4DSB2, Q4CR46, Q4CVD0, Q4DMK1, Q4CKK6, Q4CKV4, Q4DP57, Q4E413, Q4CS38, Q4DKZ7, Q4DW46, Q4DZ28, Q4DRP0, Q4E5S0, Q4D8Z5, Q4DDL9, Q4CUC6, Q4DD96, Q4D662, Q4DR65, Q4E4N3, Q4DIY7, Q4D6F3, Q4D072, Q4CQH2, Q4D6X2, Q4CT25, Q4E0X7, Q4E1P7, Q4D2A5, Q4D0Q6, Q4D821, Q4DYE1, Q4DLU8, Q4DXD8, Q4DAZ0, Q4CPI2, Q4D328, Q4CPT2, Q4DCF4, Q4E3Z8, Q4D897, Q4DNX6, Q4E4Q1 | Plays a role in protein-protein and protein-DNA interactions                                                                                                                 |
| RING               | DEXDc       | Q4DMK1, Q4E4N3                                                                                                                                                                                                                                                                                                                                                                                                                                                                                   | DNA damage repair                                                                                                                                                            |
| RING               | HELICc      | Q4DMK1, Q4E4N3                                                                                                                                                                                                                                                                                                                                                                                                                                                                                   | Helicase activity                                                                                                                                                            |
| RING               | FHA         | Q4E413, Q4DRP0                                                                                                                                                                                                                                                                                                                                                                                                                                                                                   | Recruited to E2 or their substrates by phosphorylation dependent protein-protein interactions and plays a role in initiation of cell cycle arrest at G2/M phase <sup>1</sup> |
| RING               | PHD         | Q4CZEE8, Q4CY74, Q4E4N3, Q4DIY7, Q4D6F3                                                                                                                                                                                                                                                                                                                                                                                                                                                          | May bind to E2 ubiquitin ligase <sup>2</sup>                                                                                                                                 |
| RING               | Pex2_Pe x12 | Q4E2K5                                                                                                                                                                                                                                                                                                                                                                                                                                                                                           | Role in peroxisomal biogenesis by mediating polyubiquitination and monoubiquitination of Pex5 and also plays role in receptor recycling <sup>3</sup>                         |
| RING               | zf-B_box    | Q4DT67, Q4DXI0                                                                                                                                                                                                                                                                                                                                                                                                                                                                                   | Have a zinc finger that helps in protein-protein interactions                                                                                                                |
| RING               | zf-PARP     | Q4E4N3                                                                                                                                                                                                                                                                                                                                                                                                                                                                                           | Regulatory component in DNA damage, by poly ADP-ribosylation of many target proteins such as core                                                                            |

|        |                      |                                                                                                        |  |                                                                                                                  |
|--------|----------------------|--------------------------------------------------------------------------------------------------------|--|------------------------------------------------------------------------------------------------------------------|
|        |                      |                                                                                                        |  | histones, linker histones H1 and transcription factors <sup>4</sup>                                              |
| RING   | PDB                  | Q4DRP0, Q4E413                                                                                         |  | Protein-protein interaction                                                                                      |
| RING   | SNF2_N               | Q4DMK1, Q4E4N3                                                                                         |  | ATPase of the SNF2/SWI multi-subunit complex                                                                     |
| RING   | EFH                  | Q4DI78, Q4DJF2, Q4D662, Q4DR65                                                                         |  | Calcium-binding domain                                                                                           |
| RING   | ZnF_ZZ               | Q4DYE1                                                                                                 |  | Mediating protein-protein interactions                                                                           |
| RING   | zf-UBP               | Q4DD96, Q4CUC6                                                                                         |  | Binds to monoubiquitin and polyubiquitin chains                                                                  |
| RING   | Signal Peptide       | Q4D897                                                                                                 |  | Protein transferred to secretory pathway                                                                         |
| RING   | zf-MIZ               | Q4D897, Q4DNX6, Q4E4T0, Q4CSC6, Q4DAB5, Q4D4T1, Q4CSJ0, Q4E655                                         |  | Acts as a SUMO E3 ligase                                                                                         |
| RING   | Transmembrane domain | Q4DYQ0, Q4E2K5, Q4E1T1, Q4CR46, Q4DIY7, Q4CT25, Q4E0X7, Q4D328, Q4CPT2, Q4E4Q1                         |  | Helps to anchor proteins to membrane                                                                             |
| RING   | C3H1                 | Q4DYL1, Q4DCC7                                                                                         |  | Play a role in RNA binding                                                                                       |
| Cullin | Cullin               | Q4CZ35, Q4DGF2, Q4DZU8, Q4CX33, Q4CTM0, Q4D5L7, Q4DVD1, Q4CUC0, Q4D018, Q4CRP5, Q4DB05, Q4CX65, Q4E4Q7 |  | Serve as a scaffold to bind to an adaptor protein at N-terminus and interacts with RING protein at C-terminus    |
| Cullin | Cullin NEDD8         | Q4CZ35, Q4DGF2, Q4DZU8, Q4CX33, Q4CTM0, Q4D5L7, Q4DVD1, Q4CUC0, Q4D018, Q4CRP5, Q4DB05, Q4CX65         |  | Play role in Neddylaton results in covalent conjugation of a NEDD8 moiety onto a conserved cullin lysine residue |
| Cullin | APC                  | Q4E4Q7                                                                                                 |  | Controls the M/G1 transition through ubiquitination of cyclins and other mitotic effectors.                      |
| F Box  | FBOX                 | Q4CSSG2, Q4DC93, Q4E398, Q4E4A5, Q4E3Q8, Q4CYB2, Q4DDI5, Q4D4D7                                        |  | Site of protein-protein interaction                                                                              |
| F Box  | JmjC                 | Q4E398                                                                                                 |  | Histone demethylation and as protein hydroxylases <sup>5</sup>                                                   |
| F Box  | Cupin_4              | Q4E398                                                                                                 |  | Role not established                                                                                             |
| F Box  | Cupin_8              | Q4E398                                                                                                 |  | Role not established                                                                                             |

|       |                      |                                                                                                                                |                                                                                                                            |
|-------|----------------------|--------------------------------------------------------------------------------------------------------------------------------|----------------------------------------------------------------------------------------------------------------------------|
| F Box | Clathrin             | Q4E4A5                                                                                                                         | Peculiar CHCR repeat that plays a role in protein-protein interaction and clathrin binding                                 |
| F box | Transmembrane domain | Q4CSG2, Q4DC93, Q4D4J1                                                                                                         | Helps to anchor proteins to membrane                                                                                       |
| U Box | Ubox                 | Q4DW87, Q4D7U8, Q4D029, Q4DHT9, Q4CV58                                                                                         | Known to carry the ubiquitination process in the absence of other E3 components                                            |
| U Box | Prp19                | Q4CV58                                                                                                                         | Plays a role in regulating spliceosome activity by targeting proteins for ubiquitination <sup>6</sup>                      |
| U Box | WD40                 | Q4CV58                                                                                                                         | Helping in recruitment of other proteins for protein-protein interactions                                                  |
| U Box | Coiled coil          | Q4D029, Q4DHT9, Q4CV58                                                                                                         | Diverse biological functions                                                                                               |
| HECT  | HECT                 | Q4D7V1, Q4DG19, Q4E0S6, Q4DWH5, Q4DLE5, Q4DZM6, Q4DW65, Q4DSH5, Q4DX31, Q4D5C1, Q4DWW9, Q4E2E5, Q4D547, Q4CK94, Q4DSZ1, Q4CQA0 | Catalysis reaction, Ub bound to E2 is transferred first to E3 cysteine and then transferred to lysine residue of substrate |
| HECT  | ZnF_ZZ               | Q4DWH5, Q4D547                                                                                                                 | Plays role in protein-protein interaction                                                                                  |
| HECT  | SPRY                 | Q4DSH5, Q4DW65, Q4D547, Q4E2E5                                                                                                 | Recognition of ubiquitinated substrate                                                                                     |
| HECT  | ZnF_RBZ              | Q4E2E5                                                                                                                         | Ubiquitin binding function                                                                                                 |
| HECT  | Laminin_G3           | Q4DW65                                                                                                                         | Target HECT to sugar binding molecules                                                                                     |
| HECT  | Coiled coil          | Q4D7V1, Q4E0S6, Q4CKK6, Q4DP57, Q4CS38, Q4E5S0, Q4D8Z5, Q4DDL9, Q4CT25, Q4E0X7, Q4DXD8, Q4DAZ0                                 | Diverse biological functions                                                                                               |
| HECT  | ARM                  | Q4DWH5                                                                                                                         | Identify the ubiquitination degradation signals in substrates                                                              |
| HECT  | DUF4414              | Q4D7V1                                                                                                                         | Binding function is not known but is found in DNA binding ubiquitin ligases                                                |

Domain name abbreviations used are : zfMZ - Zinc finger Msx-interacting-zinc finger, RING- Really interesting new gene finger, EFH- Calcium binding domain, PHD- Plant homeodomain finger, Zf-UBP- Zn-finger in ubiquitin-hydrolases, ZNFZZ-, FHA- Forkhead associated domain ,DEXDc- DEAD-like helicases, HELIC- Helicase superfamily c-terminal domain, Zf-PARP- Zn-finger region Poly(ADP ribose) polymerase, Cullin NEDD8-Cullin protein neddylation domain, APC- Anaphase Promoting complex , TM- Transmembrane, JmjC- Jumonji Cupin family, Prp19-Pre-mRNA-processing factor 19,Wd40- Beta-transducin repeats, HECT- Homologous to the E6-AP Carboxyl Terminus ,DUF4414- Domain of unknown function 4414 , ARM-, RPT- Internal repeats, SPRY- SPla and the Ryanodine Receptor, ZnFRBZ- Zinc finger domain in Ran-binding proteins ,ZNFZZ- Zinc-binding domain.

*\* Some of the UniProt ids are present in more than one domain category as they are comprised of multiple domains.*

Supplementary Table S3: **Predicted Number of domains of DUBs in *T. cruzi*.**

| <b>DUBs Classification</b> | <b>Domains</b> | <b>UniProt Ids*</b>                                                                                            | <b>Predicted Functions</b>                                                                                           |
|----------------------------|----------------|----------------------------------------------------------------------------------------------------------------|----------------------------------------------------------------------------------------------------------------------|
| WLM                        | WLM            | Q4D3X7, Q4DNK3                                                                                                 | Desumoylation                                                                                                        |
| WLM                        | ZnF RBZ        | Q4D3X7, Q4DNK3                                                                                                 | Ubiquitin binding                                                                                                    |
| WLM                        | zf-RanBP       | Q4D3X7, Q4DNK3                                                                                                 | Ubiquitin binding                                                                                                    |
| OTU                        | OTU            | Q4CNA5, Q4DPR2, Q4D5L1, Q4D0P2, Q4DFK1, Q4DNJ4, Q4DPZ0, Q4DPS6                                                 | Comprises the proteolytic catalytic triad                                                                            |
| OTU                        | ZnF RBZ        | Q4CNA5, Q4DPR2                                                                                                 | Ubiquitin binding                                                                                                    |
| JAB                        | JAB            | Q4DKG4, Q4CYA0, Q4DPM7, Q4DDT1, Q4DH98, Q4CYA6, Q4DL11, Q4CUS2, Q4D3R6, Q4CMJ7, Q4CK98, Q4DG61, Q4DXR1, Q4DQZ2 | Target the K63-linked polyubiquitin chains <sup>7</sup>                                                              |
| JAB                        | MitMem         | Q4DH98, Q4CYA6                                                                                                 | Normal Mitochondria morphology and function                                                                          |
| JAB                        | Coiled coil    | Q4DH98, Q4CYA6, Q4CUS2, Q4D3R6, Q4CK98, Q4CMJ7                                                                 | Diverse biological functions                                                                                         |
| JAB                        | Signal peptide | Q4CYA0, Q4DXR1, Q4DQZ2                                                                                         | Protein transferred to secretory pathway                                                                             |
| Peptidase C48              | Peptidase C48  | Q4DDC1, Q4CPQ0, Q4E418                                                                                         | Maturation of SUMO proteins (C-terminal hydrolase activity) and removal of SUMO from targets (isopeptidase activity) |
| Peptidase C54              | Peptidase C54  | Q4D5K1, Q4DFC9                                                                                                 | Associated with Urm1 proteases                                                                                       |

|                |                |                                                                                                                                                                                                                                        |                                                                                                     |
|----------------|----------------|----------------------------------------------------------------------------------------------------------------------------------------------------------------------------------------------------------------------------------------|-----------------------------------------------------------------------------------------------------|
| Peptidase C97  | Peptidase C97  | Q4DJ21, Q4DM33, Q4E565, Q4DWL2, Q4DFR6, Q4CQT6, Q4E560, Q4DWK7, Q4D3X5, Q4DNK1                                                                                                                                                         | Thiol peptidase activity                                                                            |
| Peptidase C97  | PUB            | Q4DJ21, Q4DM33                                                                                                                                                                                                                         | Associated with ubiquitin                                                                           |
| Peptidase C97  | Glyco hydro 85 | Q4DJ21, Q4DM33                                                                                                                                                                                                                         | Function not established                                                                            |
| UCH            | UCH            | Q4DCS7, Q4E259, Q4D6N2, Q4E391, Q4DG39, Q4E680, Q4DYG8, Q4DS35, Q4CRZ3, Q4CYB0, Q4D313, Q4CTT7, Q4DFS1, Q4DMB6, Q4E0W2, Q4DTJ5, Q4DRN4, Q4E407, Q4D1W6, Q4DNK8, Q4CTT9, Q4E0K4, Q4DW10, Q4CXY4, Q4DF80, Q4D0S8, Q4CL15, Q4DFD2, Q4CUI7 | Hydrolyze small amides and esters at the C-terminus of ubiquitin                                    |
| UCH            | DUSP           | Q4DCS7, Q4E259                                                                                                                                                                                                                         | Role in ubiquitin specific protease activity                                                        |
| UCH            | USP7 C2        | Q4DG39                                                                                                                                                                                                                                 | Role not established                                                                                |
| UCH            | USP7 ICP0 bdg  | Q4DG39, Q4E0W2                                                                                                                                                                                                                         | Interact with herpesvirus 1 trans-acting transcriptional protein E3 ligase ICP0/MMW110 <sup>8</sup> |
| UCH            | zf UBP         | Q4E680                                                                                                                                                                                                                                 | Functions as isopeptidase by cleaving isopeptide bond between ubiquitin moieties                    |
| UCH            | UBA            | Q4E680, Q4CXY4                                                                                                                                                                                                                         | Interaction of ubiquitin                                                                            |
| UCH            | ZnFRBZ         | Q4CRZ3, Q4CL15                                                                                                                                                                                                                         | Ubiquitin binding function                                                                          |
| UCH            | UBQ            | Q4CYB0, Q4D313, Q4CL15                                                                                                                                                                                                                 | Role in ubiquitin hydrolyase activity                                                               |
| UCH            | SCOP           | Q4DFD2                                                                                                                                                                                                                                 | Plays role in protein-protein interaction                                                           |
| UCH            | EXOIII         | Q4DFD2                                                                                                                                                                                                                                 | Stimulate the nuclease activity of DUBs                                                             |
| UCH            | Coiled coil    | Q4D6N2, Q4E391, Q4D1W6, Q4E0V5                                                                                                                                                                                                         | Diverse biological functions                                                                        |
| Ribosomal S19e | Ribosomal S19e | Q4D6N9, Q4DJY1                                                                                                                                                                                                                         | Role is not established                                                                             |

Domain name abbreviations used are: WLM- Wss like metalloprotease, ZnFRBZ- Zinc finger domain in Ran-binding proteins, zf-RanBP- Zinc finger domain in Ran BP2 binding protein, OTU- Ovarian tumour domain, JAB-Jun kinase activation domain binding protein, PUB- Protein module of unknown function, UCH- Ubiquitin carboxyl-terminal hydrolases, DUSP-Domain present in ubiquitin-

specific proteases, USP7 C2- Ubiquitin specific protease 7 C terminal, USP7 ICP0 bdg- Ubiquitin specific protease 7 ICP0 bdg, zFUBP- Ubiquitin Carboxyl-terminal hydrolase-like zinc finger ,UBA- Ubiquitin associated domain, UBQ- Ubiquitin, SCOP- Superfamily WD40 like repeat , EXOIII- Exonuclease domain.

*\* Some of the UniProt ids are present in more than one domain category as they are comprised of multiple domains*

Supplementary Table S4: **The complete list of all the predicted proteins localization in different cellular compartments.** UniProt id and cell organelles are given.

| <b>Cytoplasm</b> | <b>Nucleus</b> | <b>Mitochondria</b> | <b>Cytoskeleton</b> | <b>Plasma membrane</b> | <b>Membrane</b> | <b>Peroxisome</b> |
|------------------|----------------|---------------------|---------------------|------------------------|-----------------|-------------------|
| Q4CQH2           | Q4D110         | Q4CMJ7              | Q4CKV4              | Q4CT25                 | Q4CPT2          | Q4DJF2            |
| Q4CTM0           | Q4D5L7         | Q4CNA5              | Q4CUC6              | Q4DC93                 | Q4D328          |                   |
| Q4CUS2           | Q4D662         | Q4CTT9              | Q4D7U8              | Q4DW46                 |                 |                   |
| Q4CV58           | Q4D6F3         | Q4CUI7              | Q4D821              | Q4E0X7                 |                 |                   |
| Q4D029           | Q4D6N2         | Q4CXY4              | Q4DAL0              | Q4E2K5                 |                 |                   |
| Q4D0P2           | Q4D6N9         | Q4D1W6              | Q4DCS7              |                        |                 |                   |
| Q4D3X7           | Q4D8Z5         | Q4D3R6              | Q4DD96              |                        |                 |                   |
| Q4D547           | Q4DB05         | Q4D5K1              | Q4DFC9              |                        |                 |                   |
| Q4D5C1           | Q4DB31         | Q4D5L1              | Q4DT67              |                        |                 |                   |
| Q4D6X2           | Q4DCF4         | Q4D6U5              | Q4DTJ5              |                        |                 |                   |
| Q4DFD2           | Q4DF80         | Q4DDC1              | Q4DXI0              |                        |                 |                   |
| Q4DG61           | Q4DFR6         | Q4DDT1              | Q4E4I8              |                        |                 |                   |

|        |        |         |        |  |  |  |
|--------|--------|---------|--------|--|--|--|
| Q4DHT9 | Q4DFS1 | Q4DJY1  | Q4DFC9 |  |  |  |
| Q4DJ21 | Q4DG39 | Q4DKG4  | Q4E680 |  |  |  |
| Q4DM33 | Q4DGF2 | Q4DNJ4  |        |  |  |  |
| Q4DNK3 | Q4DI78 | Q4DNK8  |        |  |  |  |
| Q4DX31 | Q4DIY7 | Q4DPR2  |        |  |  |  |
| Q4DYG8 | Q4DKZ7 | Q4DS35  |        |  |  |  |
| Q4E4Q7 | Q4DL73 | Q4DWW10 |        |  |  |  |
|        | Q4DLU8 | Q4DWK7  |        |  |  |  |
|        | Q4DMB6 | Q4DWWL2 |        |  |  |  |
|        | Q4DPJ5 | Q4E0V5  |        |  |  |  |
|        | Q4DPM7 | Q4E0K4  |        |  |  |  |
|        | Q4DPS6 | Q4E560  |        |  |  |  |
|        | Q4DR65 | Q4E565  |        |  |  |  |
|        | Q4DRN4 | Q4CKL0  |        |  |  |  |
|        | Q4DRP0 | Q4CRP5  |        |  |  |  |
|        | Q4DSB2 | Q4CX33  |        |  |  |  |
|        | Q4DSZ1 | Q4CY74  |        |  |  |  |
|        | Q4DVD1 | Q4CZE8  |        |  |  |  |



|  |        |        |  |  |  |  |
|--|--------|--------|--|--|--|--|
|  | Q4DW87 | Q4D0Q6 |  |  |  |  |
|  | Q4DWH5 | Q4D2A5 |  |  |  |  |
|  | Q4DZ28 | Q4D4T1 |  |  |  |  |
|  | Q4DZU8 | Q4DAB5 |  |  |  |  |
|  | Q4E0W2 | Q4DG19 |  |  |  |  |
|  | Q4E259 | Q4DMK1 |  |  |  |  |
|  | Q4E391 | Q4DNX6 |  |  |  |  |
|  | Q4E407 | Q4DP57 |  |  |  |  |
|  | Q4E413 | Q4DYE1 |  |  |  |  |
|  | Q4E4N3 | Q4E0S6 |  |  |  |  |
|  | Q4E655 | Q4E398 |  |  |  |  |
|  | Q4DDL9 | Q4E3Z8 |  |  |  |  |
|  | Q4DYL1 | Q4E4T0 |  |  |  |  |
|  | Q4DCC7 | Q4E5S0 |  |  |  |  |
|  | Q4DH98 | Q4DFK1 |  |  |  |  |
|  | Q4CK94 |        |  |  |  |  |
|  | Q4CKK6 |        |  |  |  |  |
|  | Q4CPI2 |        |  |  |  |  |

|  |        |  |  |  |  |  |
|--|--------|--|--|--|--|--|
|  | Q4CQA0 |  |  |  |  |  |
|  | Q4CQT6 |  |  |  |  |  |
|  | Q4CS38 |  |  |  |  |  |
|  | Q4CSG6 |  |  |  |  |  |
|  | Q4CSJ0 |  |  |  |  |  |
|  | Q4CTT7 |  |  |  |  |  |
|  | Q4CUC0 |  |  |  |  |  |
|  | Q4CVD0 |  |  |  |  |  |
|  | Q4CYA6 |  |  |  |  |  |
|  | Q4CZ35 |  |  |  |  |  |
|  | Q4D018 |  |  |  |  |  |
|  | Q4D0S8 |  |  |  |  |  |
|  | Q4D0X0 |  |  |  |  |  |

Supplementary Table S5: **The complete list of all the predicted proteins secreted and localized in more than one cellular compartments.** UniProt id and cell organelles are given

| Cytoplasm,<br>Nucleus | Cytoplasm,<br>Mitochondria | Mitochondria<br>(membrane) | Secreted | Nucleus,<br>Secreted | Mitochondria,<br>Secreted |
|-----------------------|----------------------------|----------------------------|----------|----------------------|---------------------------|
| Q4CK98                | Q4CPQ0                     | Q4CSG2                     | Q4CR46   | Q4DQZ2               | Q4CYA0                    |
| Q4DPZ0                | Q4D313                     | Q4DYQ0                     | Q4D897   | Q4DXR1               | Q4CRZ3                    |
| Q4D072                |                            |                            | Q4E1T1   | Q4DAZ0               | Q4DLE5                    |
| Q4E1P7                |                            |                            | Q4E4A5   | Q4DWW9               | Q4CL15                    |
|                       |                            |                            |          | Q4DXD8               | Q4E3Q8                    |
|                       |                            |                            |          |                      | Q4CYB2                    |

Supplementary Table S6: **The complete list of all the proteins upregulated and downregulated using expression data analysis at four life cycle stages using a cutoff value of 1.2.** UniProt id and stages are given. Abbreviations used: a-amastigote, t-trypomastigote, e-epimastigote, m-metacyclics.

| Stages                                | a      | t      | e      | m      |
|---------------------------------------|--------|--------|--------|--------|
| <b>Upregulated Gene (UniProt Ids)</b> | Q4D5L7 | Q4CS38 | Q4D3X5 | Q4E1T1 |
|                                       | Q4D6X2 | Q4DL11 | Q4DFS1 | Q4CUC6 |
|                                       | Q4D7U8 | Q4DWL2 | Q4DIY7 | Q4CUS2 |

|  |        |        |        |        |
|--|--------|--------|--------|--------|
|  | Q4D897 | Q4E0W2 | Q4DYQ0 | Q4DWH5 |
|  | Q4DMB6 | Q4E5S0 |        | Q4CYA0 |
|  | Q4DSZ1 |        |        | Q4CZ35 |
|  |        |        |        | Q4D0Q6 |
|  |        |        |        | Q4D547 |
|  |        |        |        | Q4D5K1 |
|  |        |        |        | Q4D8Z5 |
|  |        |        |        | Q4DFK1 |
|  |        |        |        | Q4DKG4 |
|  |        |        |        | Q4DNJ4 |

| Stages                                  | a      | t      | e      | m      |
|-----------------------------------------|--------|--------|--------|--------|
| <b>Downregulated Gene (Uniprot Ids)</b> | Q4CMJ7 | Q4D3X7 | Q4CVD0 | Q4CYA6 |
|                                         | Q4CTT9 | Q4DW10 | Q4CPT2 | Q4D4T1 |
|                                         | Q4CUS2 | Q4DXI0 | Q4CS38 | Q4D6X2 |
|                                         | Q4CYA0 |        | Q4DAL0 | Q4DFD2 |
|                                         | Q4D0Q6 |        | Q4DPM7 | Q4DG61 |

|  |        |  |        |        |
|--|--------|--|--------|--------|
|  | Q4D6U5 |  | Q4DR65 | Q4DSZ1 |
|  | Q4DB31 |  | Q4DWK7 | Q4E398 |
|  | Q4DC93 |  | Q4DZU8 | Q4E413 |
|  | Q4DHT9 |  | Q4E0X7 |        |
|  | Q4DKG4 |  | Q4E1P7 |        |
|  | Q4DS35 |  | Q4E391 |        |
|  | Q4DWH5 |  | Q4E4A5 |        |
|  | Q4DYE1 |  | Q4E4N3 |        |
|  |        |  | Q4E5S0 |        |

## References:

- 1 Durocher, D. & Jackson, S. P. The FHA domain. *FEBS letters* **513**, 58-66 (2002).
- 2 Bienz, M. The PHD finger, a nuclear protein-interaction domain. *Trends in biochemical sciences* **31**, 35-40 (2006).
- 3 Platta, H. W. *et al.* Pex2 and pex12 function as protein-ubiquitin ligases in peroxisomal protein import. *Molecular and cellular biology* **29**, 5505-5516 (2009).
- 4 Langelier, M.-F. & Pascal, J. M. PARP-1 mechanism for coupling DNA damage detection to poly (ADP-ribose) synthesis. *Current opinion in structural biology* **23**, 134-143 (2013).
- 5 Klose, R. J., Kallin, E. M. & Zhang, Y. JmjC-domain-containing proteins and histone demethylation. *Nature Reviews Genetics* **7**, 715-727 (2006).
- 6 Vander Kooi, C. W. *et al.* The Prp19 WD40 domain contains a conserved protein interaction region essential for its function. *Structure* **18**, 584-593 (2010).
- 7 Reyes-Turcu, F. E., Ventii, K. H. & Wilkinson, K. D. Regulation and cellular roles of ubiquitin-specific deubiquitinating enzymes. *Annual review of biochemistry* **78**, 363-397 (2009).
- 8 Perusina Lanfranca, M., Mostafa, H. H. & Davido, D. J. HSV-1 ICP0: an E3 ubiquitin ligase that counteracts host intrinsic and innate immunity. *Cells* **3**, 438-454 (2014).
